# Supplementary material for: Facile preparation of mesoporous Cu–Sn solid solutions as active catalysts for CO oxidation
Source: Royal Society of Chemistry journal article supplement (doi:10.1039/c5ra00635j), 2015-01-01
Supplement: c5ra00635j1.pdf [file c5ra00635j1.pdf]

## Supporting Information

### Facile Preparation of Mesoporous Cu-Sn Solid Solution as Active Catalysts for CO Oxidation

Yarong Li<sup>†</sup>, Honggen Peng<sup>†</sup>, Xianglan Xu, Yue Peng, Xiang Wang<sup>\*</sup>

**Table S1. H<sub>2</sub>-TPR quantification results of Cu<sub>x</sub>Sn<sub>1-x</sub>O<sub>y</sub> catalysts.**

| Samples                                              | H <sub>2</sub> consumption (mmol g <sup>-1</sup> ) |         |              |
|------------------------------------------------------|----------------------------------------------------|---------|--------------|
|                                                      | Below 250 °C                                       | ~350 °C | Above 450 °C |
| SnO <sub>2</sub>                                     | -                                                  | -       | 9.5          |
| Cu <sub>0.15</sub> Sn <sub>0.85</sub> O <sub>y</sub> | 1.3                                                | 0.1     | 8.5          |
| Cu <sub>0.2</sub> Sn <sub>0.8</sub> O <sub>y</sub>   | 1.7                                                | 0.2     | 7.9          |
| Cu <sub>0.3</sub> Sn <sub>0.7</sub> O <sub>y</sub>   | 2.7                                                | 0.4     | 7.3          |
| Cu <sub>0.4</sub> Sn <sub>0.6</sub> O <sub>y</sub>   | 3.7                                                | 0.4     | 6.7          |
| Cu <sub>0.5</sub> Sn <sub>0.5</sub> O <sub>y</sub>   | 4.9                                                | 0.6     | 6.1          |
| Cu <sub>0.6</sub> Sn <sub>0.4</sub> O <sub>y</sub>   | 6.2                                                | 0.3     | 5.5          |
| CuO                                                  | 12.8                                               | -       | -            |

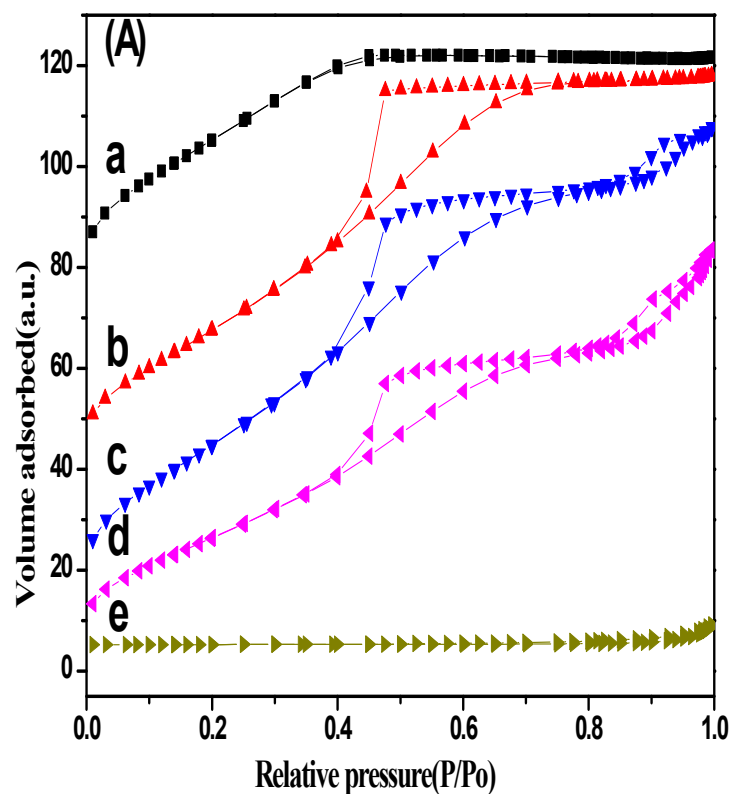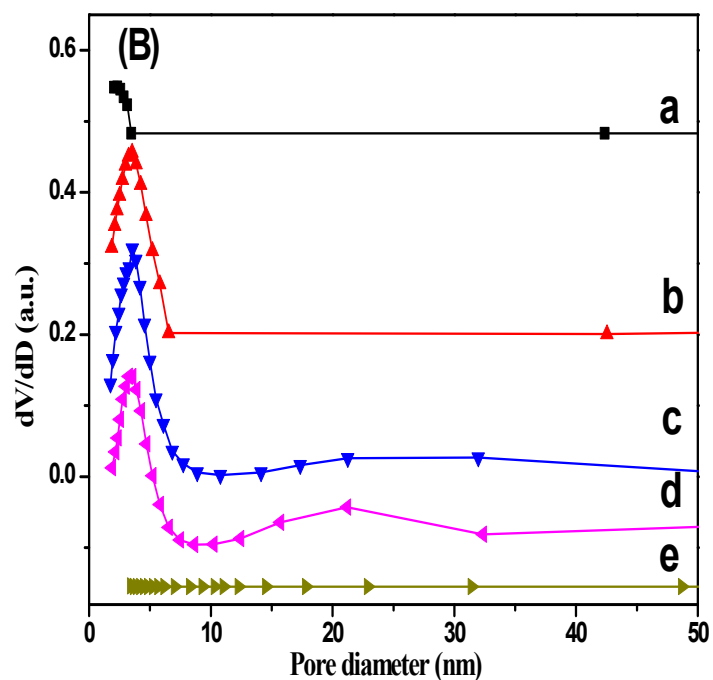

Fig. S1. N<sub>2</sub> adsorption-desorption isotherms (A) and pore size distributions (B).  
 (a) SnO<sub>2</sub>, (b) Cu<sub>0.2</sub>Sn<sub>0.8</sub>O<sub>y</sub>, (c) Cu<sub>0.5</sub>Sn<sub>0.5</sub>O<sub>y</sub>, (d) Cu<sub>0.6</sub>Sn<sub>0.4</sub>O<sub>y</sub>, (e) CuO.

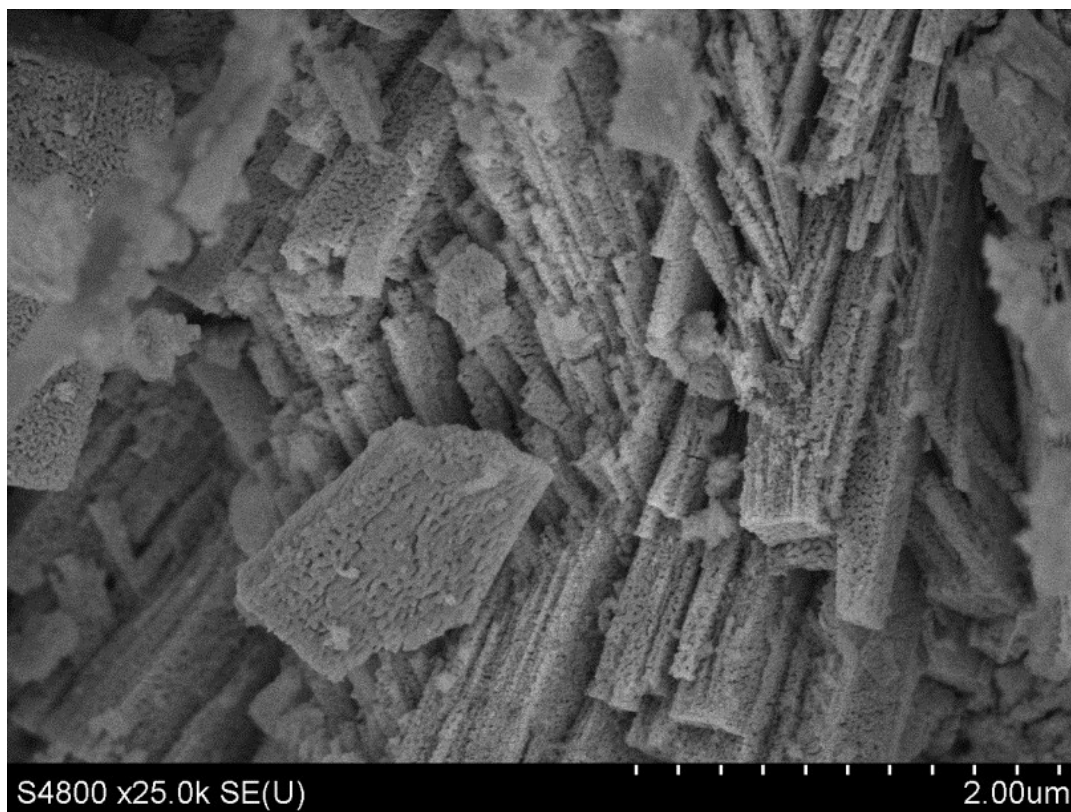

**Fig. S2. SEM image of  $\text{Cu}_{0.5}\text{Sn}_{0.5}\text{O}_y$  catalyst with a lower magnification.**

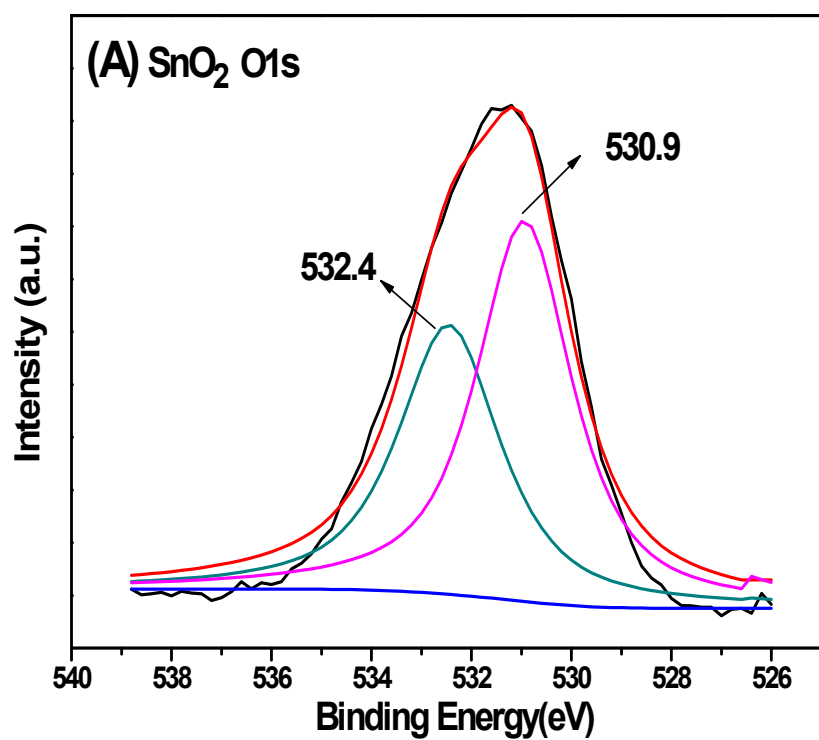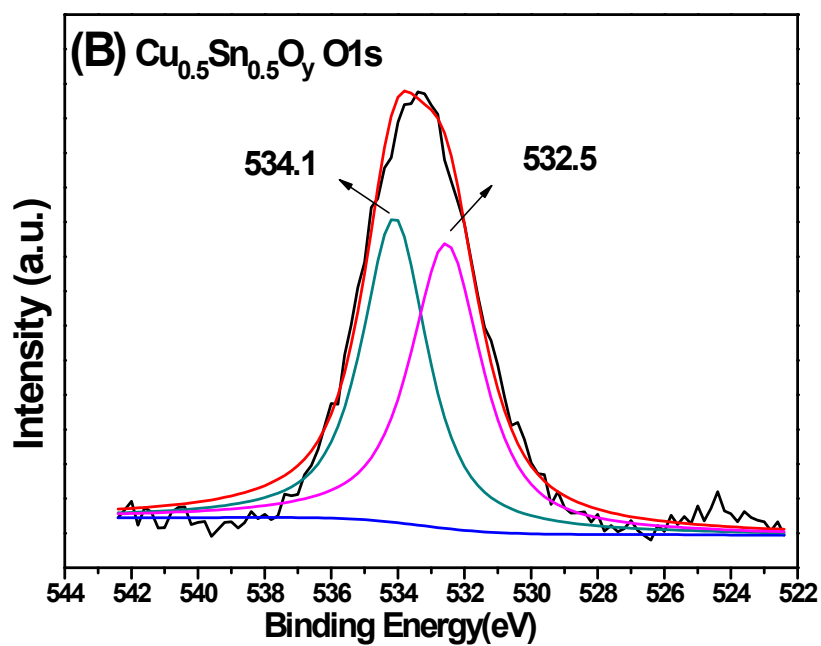

Fig. S3. The deconvolution and peak fitting of O1s peaks  
(A) SnO<sub>2</sub>, (B) Cu<sub>0.5</sub>Sn<sub>0.5</sub>O<sub>y</sub>

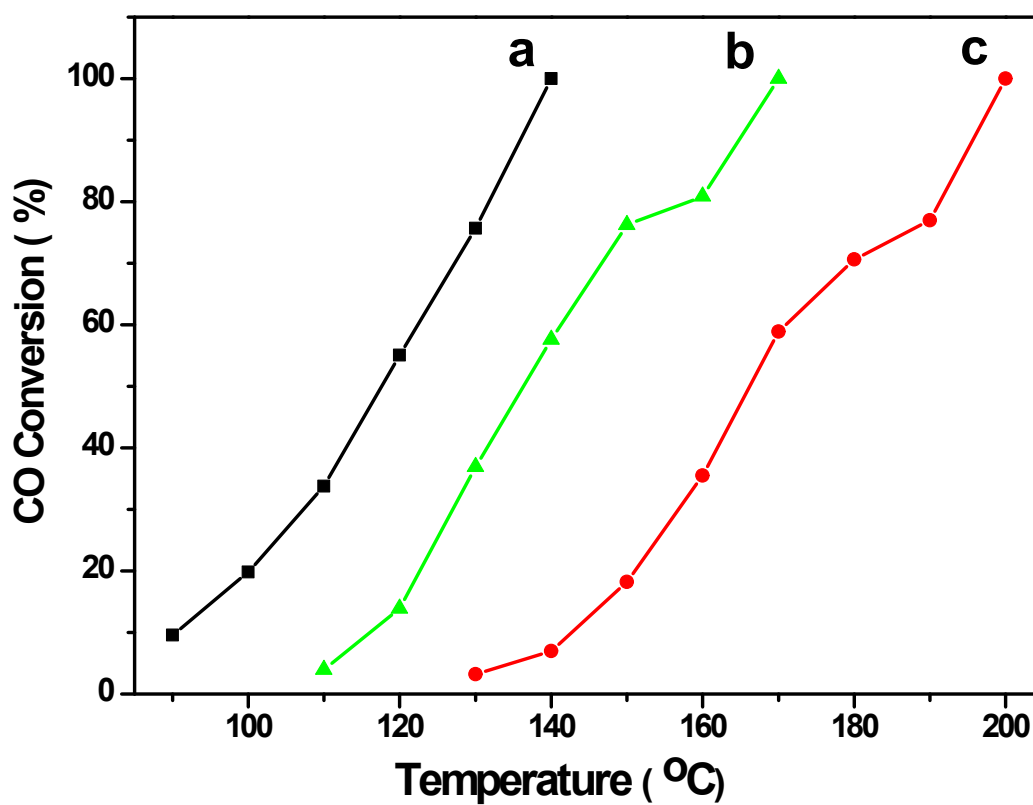

**Fig. S4. CO oxidation on Cu-Sn oxide catalysts with a Cu/Sn molar ratio of 0.5/0.5 prepared by different methods.**

**(a)  $\text{Cu}_{0.5}\text{Sn}_{0.5}\text{O}_y$ : prepared with co-precipitation method**

**(b) IMP-300: prepared by impregnating  $\text{Cu}(\text{NO}_3)_2$  solution onto  $\text{SnO}_2$  powder calcined at 300 °C**

**(c) IMP-110: prepared by impregnating  $\text{Cu}(\text{NO}_3)_2$  solution onto  $\text{SnO}_2$  powder dried at 110 °C**
